# Supplementary material for: Signaling mechanisms of a water soluble curcumin derivative in experimental type 1 diabetes with cardiomyopathy
Source: Springer Nature journal article supplement (doi:10.1186/1758-5996-5-13), 2013-03-12
Supplement: 13098_2012_203_MOESM1_ESM.pdf [file 13098_2012_203_MOESM1_ESM.pdf]

# HO-1 gene expression

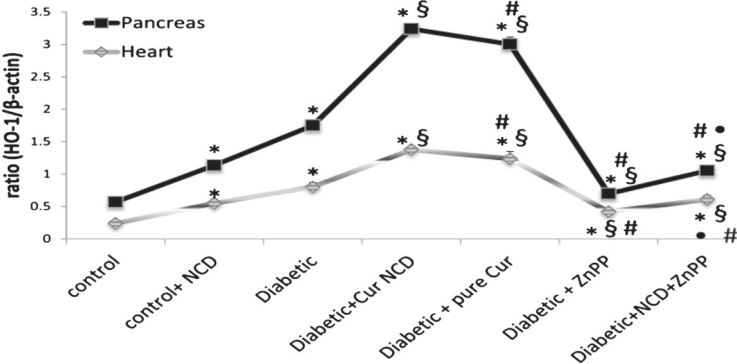

Results are presented as mean  $\pm$  SD

\*Values differ significantly from control  $p < 0.001$

§ Values differ significantly from diabetic  $p < 0.001$

# Values differ significantly from diabetic +NCD  $p < 0.001$

• Values differ significantly from diabetic + inhibitor  $p < 0.001$
